# Supplementary material for: Pancreatic β-Cell O-GlcNAc Transferase Overexpression Increases Susceptibility to Metabolic Stressors in Female Mice
Source: MDPI journal article supplement (doi:10.3390/cells10102801), 2021-10-19
Supplement: s1 [file s1]

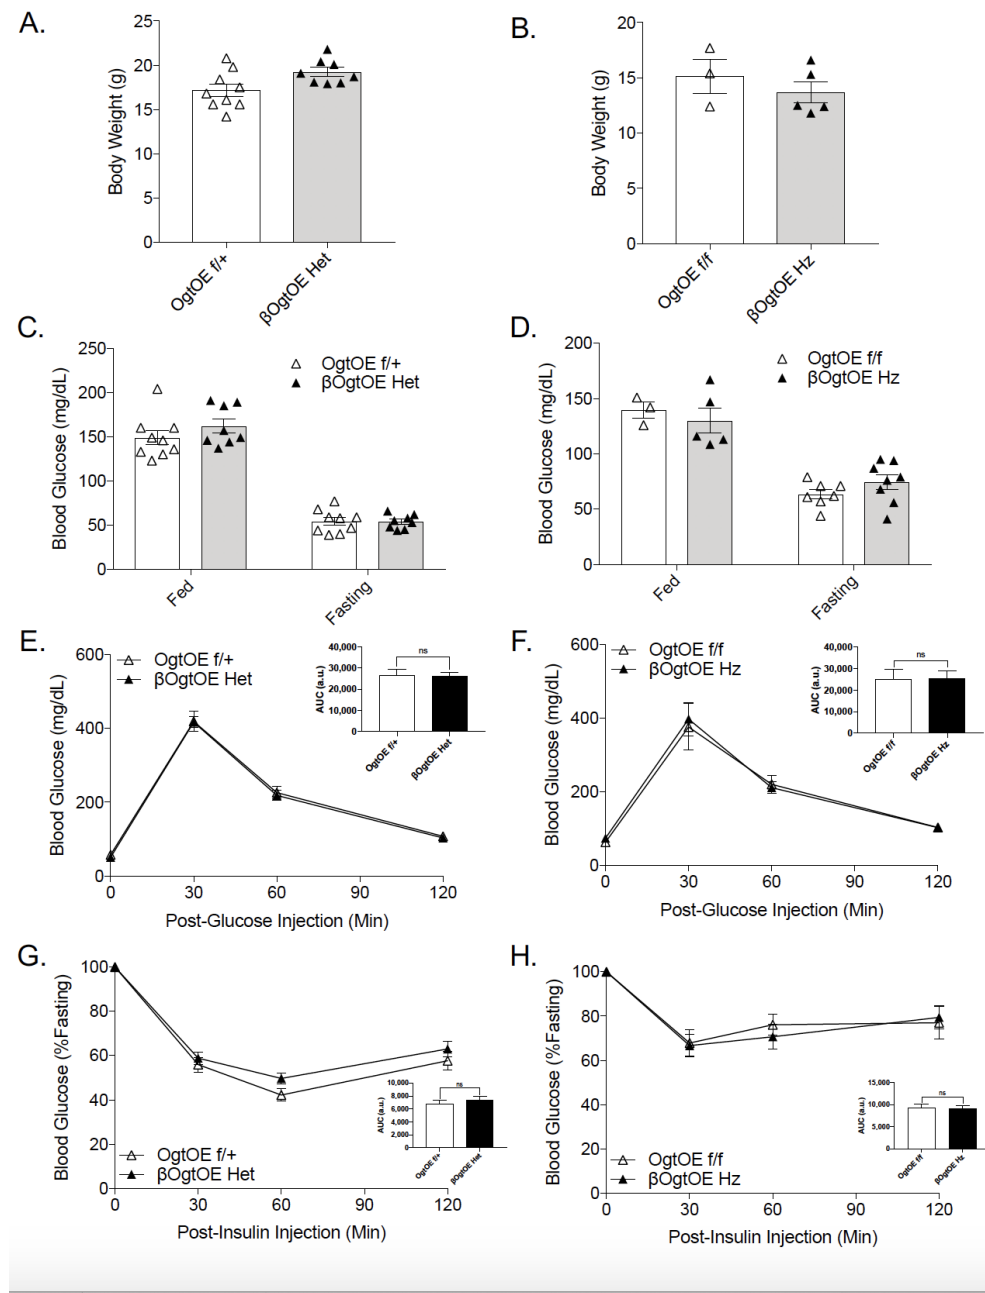

**Supplemental Figure S1.** Body weight from male  $\beta$ OgtOE Het (A) and  $\beta$ OgtOE Hz (B) with their respective littermate controls at 4-wks of age ( $n = 3-5$   $\beta$ OgtOE Het,  $n = 8-9$   $\beta$ OgtOE Hz). Random blood glucose under random fed and post-16 hour fast from  $\beta$ OgtOE Het (C) and  $\beta$ OgtOE Hz (D) with their respective littermate controls at 4-wks of age ( $n = 8-9$   $\beta$ OgtOE Het,  $n = 3-8$   $\beta$ OgtOE Hz). Intraperitoneal glucose tolerance test (glucose 2 g/kg) from  $\beta$ OgtOE Het (E) and  $\beta$ OgtOE Hz (F), with littermate controls at 4-wks of age ( $n = 8$   $\beta$ OgtOE Het,  $n = 7-8$   $\beta$ OgtOE Hz). Intraperitoneal insulin tolerance test (insulin 0.75 U/kg) from  $\beta$ OgtOE Het (G) and  $\beta$ OgtOE Hz (H), with littermate controls at 6-wks of age ( $n = 10-14$   $\beta$ OgtOE Het,  $n = 7-8$   $\beta$ OgtOE Hz). Statistical analyses were conducted using unpaired, two-tailed Student's *t* test or 2-way ANOVA, with significance  $p < 0.05$ .

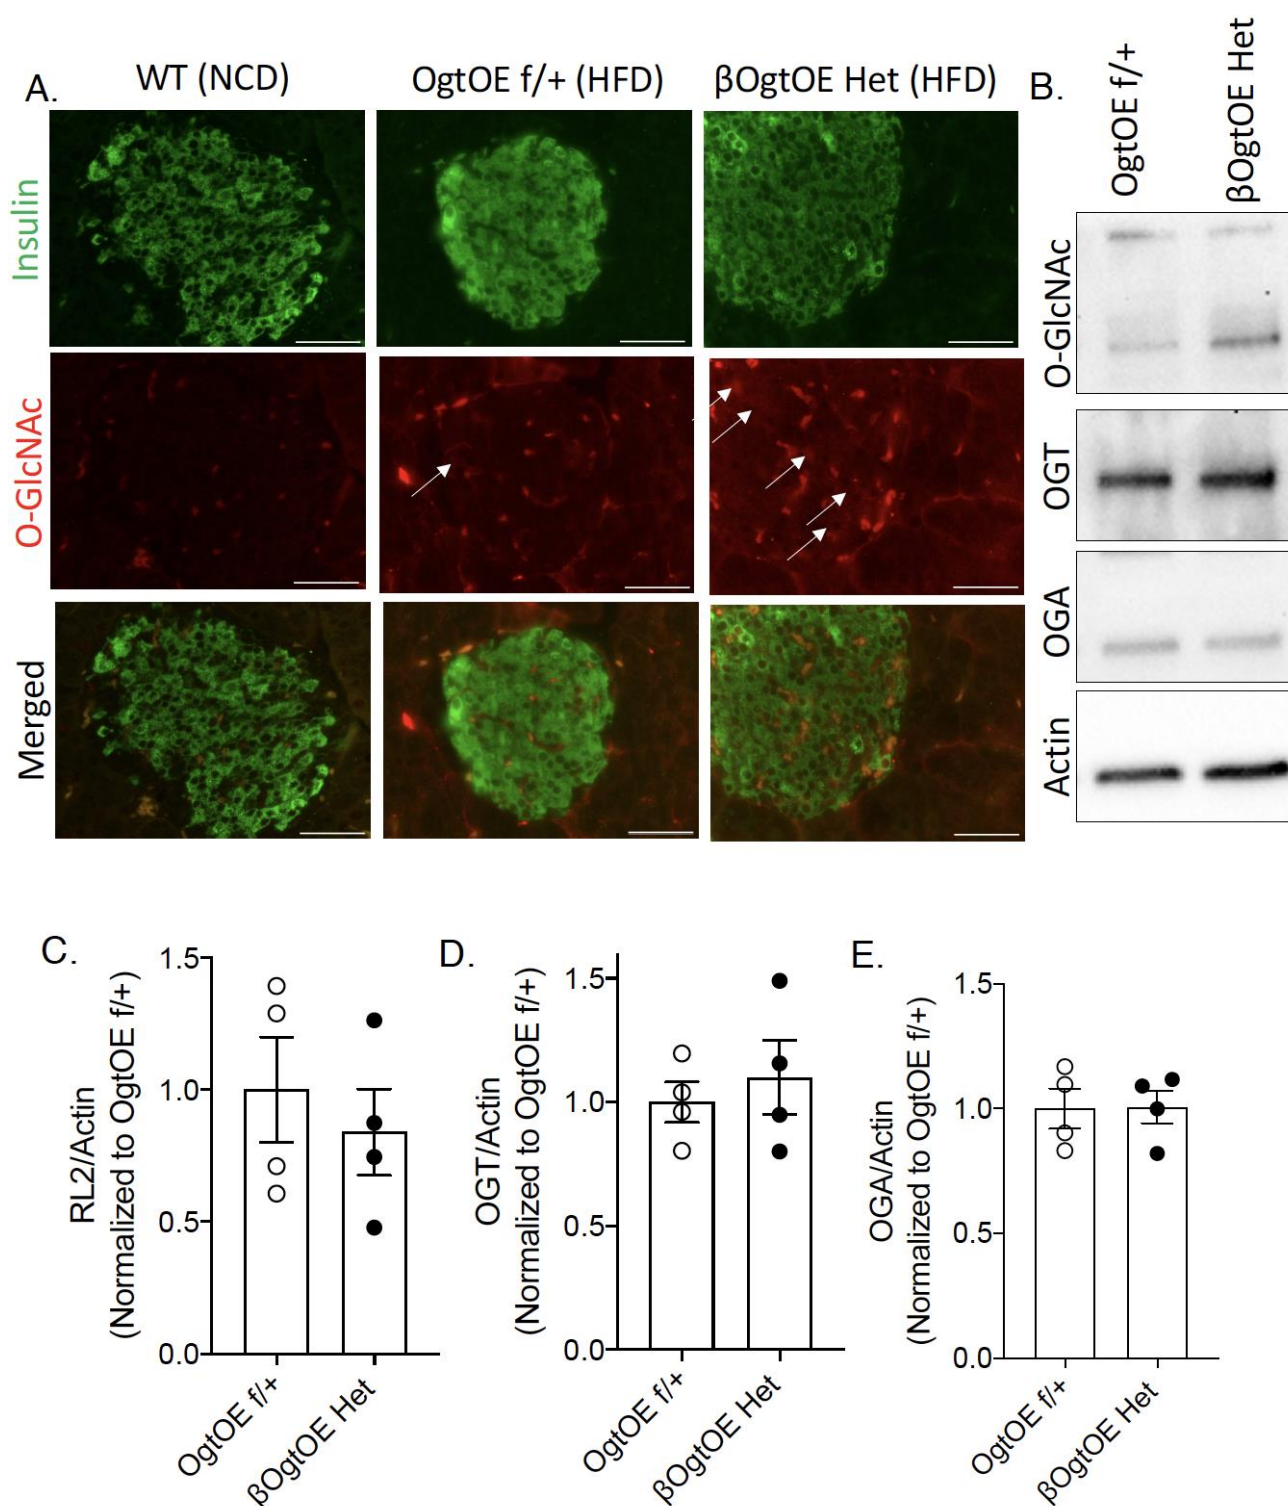

**Supplemental Figure S2.** (A) Representative IF image of WT (normal chow diet; NCD), OgtOE f/+, and  $\beta$ OgtOE Het (high fat diet 20-wks; HFD) pancreas against insulin (green), O-GlcNAcylation (red), and white arrow showing presence of RL2, Table 60. x, and scale Bar = 50 $\mu$ m. (B) Representative image of western blot of OgtOE f/+, and  $\beta$ OgtOE Het islets Figure 20. wks, showing pan-O-GlcNAcylation, Ogt, Oga and Actin,  $n = 4$ .

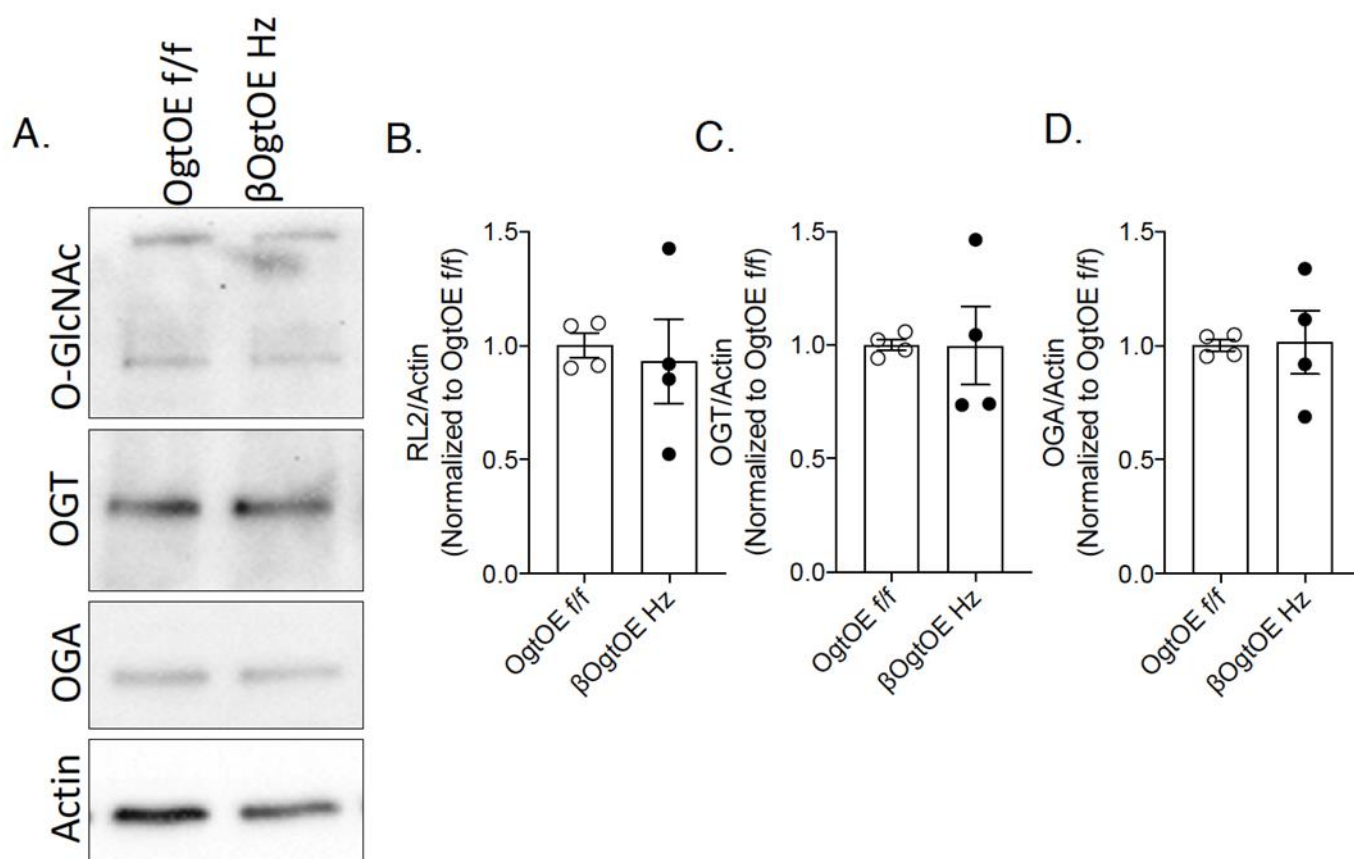

**Supplemental Figure S3.** (A) Representative image of western blot of OgtOE f/f, and βOgtOE Hz islets from mice fed HFD Figure 20. wks, showing pan-O-GlcNAcylation, Ogt, Oga and Actin,  $n = 4$ . (B–D) are quantifications of RL2/Actin (B), Ogt/Actin (C), and Oga/Actin (D).

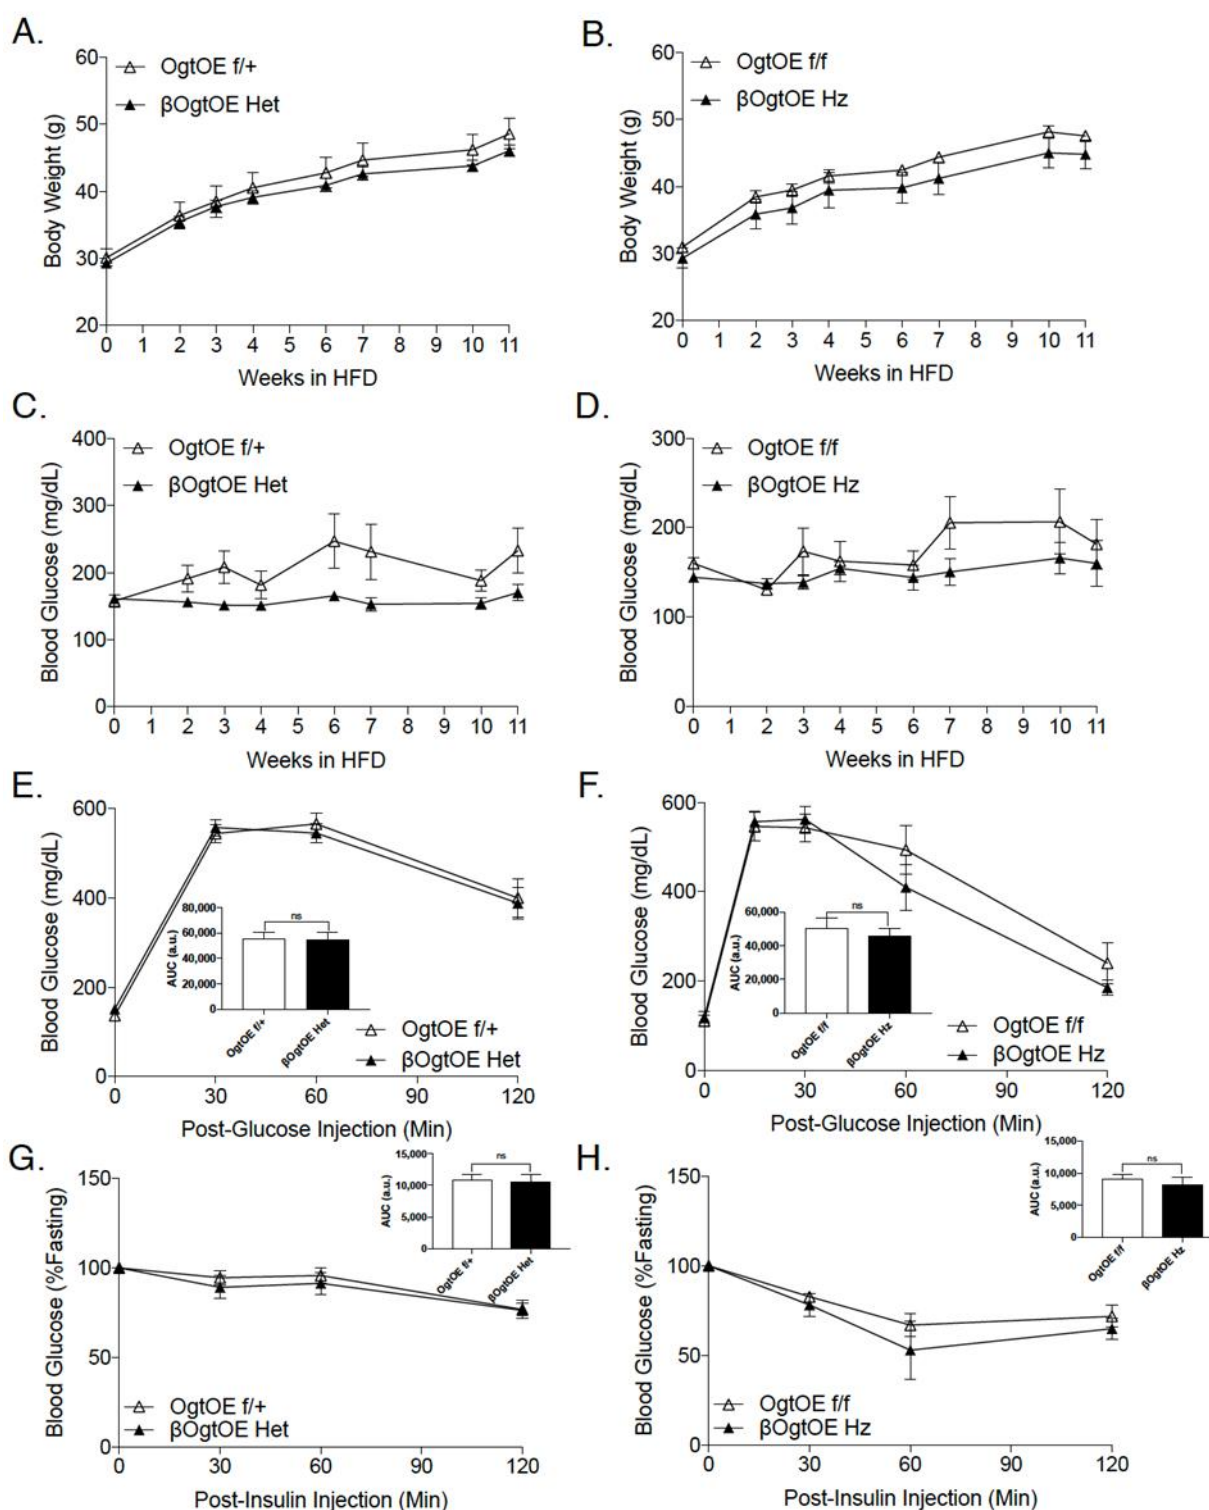

**Supplemental Figure S4.** Body weight over the course of 11 wks of high fat diet (HFD) in male  $\beta$ OgtOE Het (A) and  $\beta$ OgtOE Hz (B) with respective littermate controls. Random blood glucose over the course of 11 wks of HFD in  $\beta$ OgtOE Het (C) and  $\beta$ OgtOE Hz (D) with respective littermate ( $n = 10-16$   $\beta$ OgtOE Het,  $n = 6$   $\beta$ OgtOE Hz). Intraperitoneal glucose (2.0 g/kg) from  $\beta$ OgtOE Het (E) and  $\beta$ OgtOE Hz (F), with littermate controls at 16-wks HFD ( $n = 10-16$   $\beta$ OgtOE Het,  $n = 6$   $\beta$ OgtOE Hz). Intraperitoneal insulin tolerance test (insulin 0.75 U/kg) from  $\beta$ OgtOE Het (G) and  $\beta$ OgtOE Hz (H), with littermate controls at 17-wks high fat diet (HFD) ( $n = 10-16$   $\beta$ OgtOE Het,  $n = 4-6$   $\beta$ OgtOE Hz). Statistical analyses were conducted using 2-way ANOVA with multiple comparisons, with significance  $p < 0.05$ , ns=non-significant.

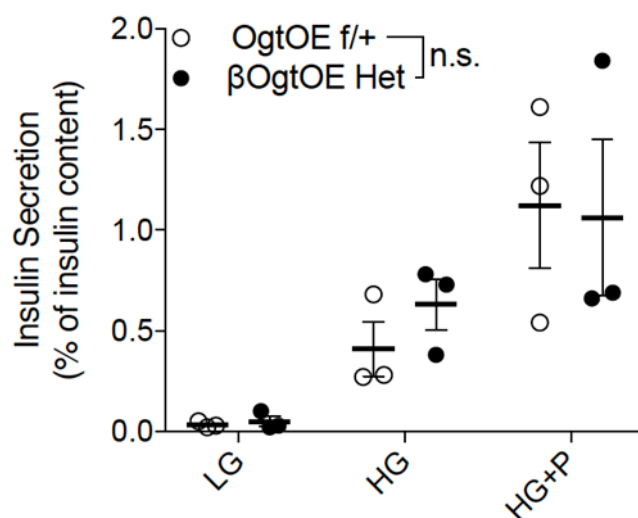

**Supplemental Figure S5.** In vitro insulin secretion in response to low glucose (LG, 3 mM) to high glucose (HG) (16.7 mM) with palmitate (100  $\mu$ M; pre-complexed 6:1 to BSA, HG+p) in  $\beta$ OgtOE Het and control islets.

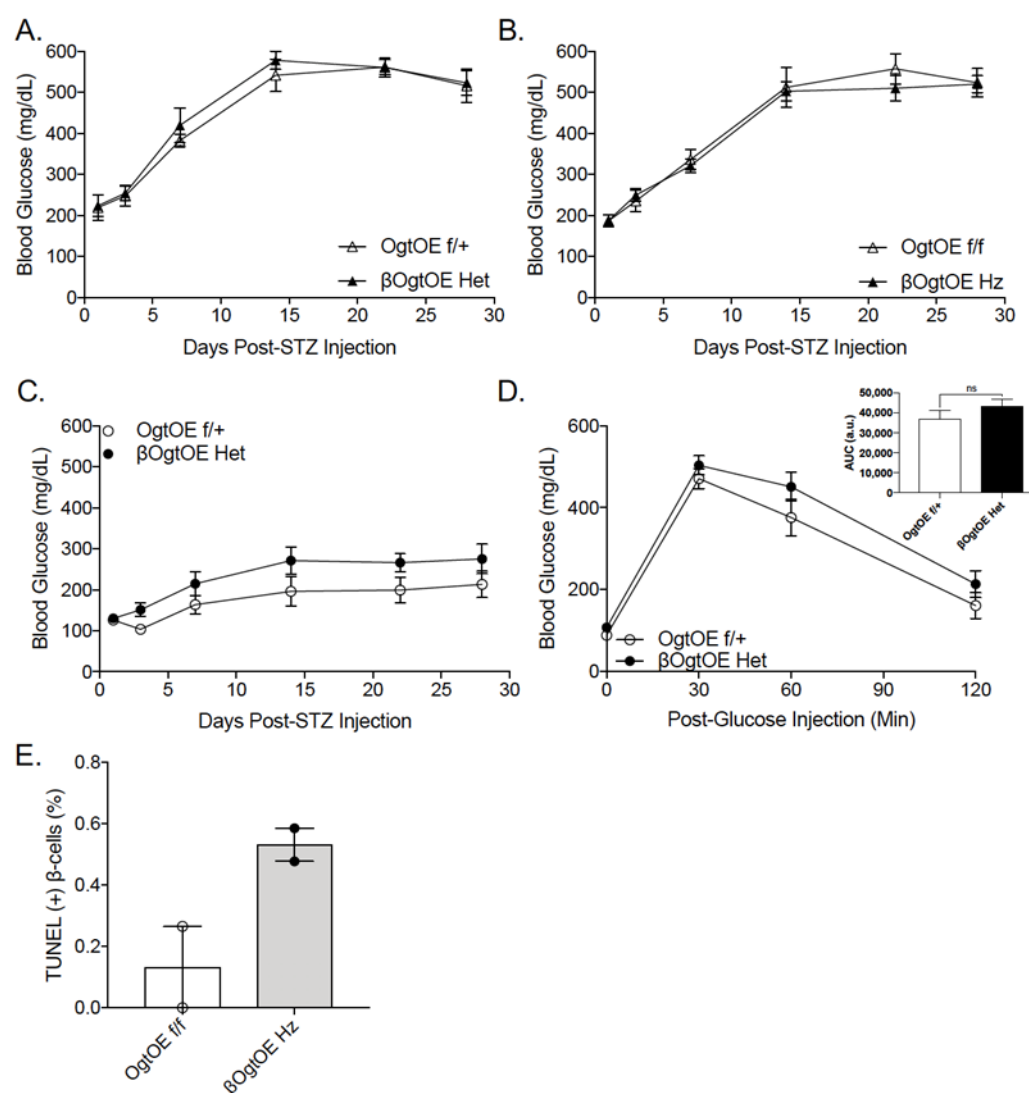



**Supplemental Figure S6.** Blood glucose over 4-wks post-STZ injection in male  $\beta$ OgtOE Het (A) and  $\beta$ OgtOE Hz (B) with littermate controls ( $n = 4-6$ ). Blood glucose over 4-wks post-STZ injection (C) and intraperitoneal glucose tolerance test at 4-wks post-STZ in female  $\beta$ OgtOE Het (D) ( $n = 5$ ). Apoptosis of  $\beta$ -cells were measured through TUNEL immunofluorescence staining in control and  $\beta$ OgtOE Hz pancreas (TUNEL (+)  $\beta$ -cells% to total  $\beta$ -cells counted) (E) ( $n = 2$ ), ns=non-significant.

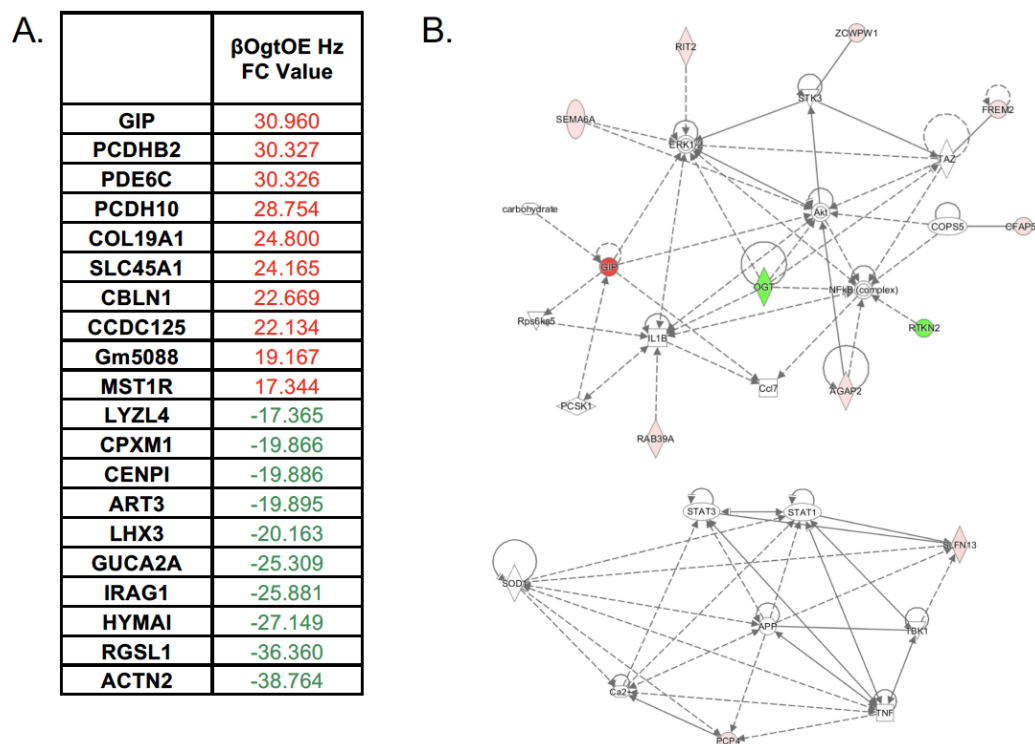

**Supplemental Figure S7.** (A) Top 10 upregulated and downregulated genes from  $\beta$ OgtOE Hz RNAseq. (B) Network analysis of the overlapping genes of interest from  $\beta$ OgtKO dataset, involving 10 (network 1) or 2 (network 2) sets of genes; red = upregulated, green = downregulated.

Table S1: Primer sequences list

| Gene. | Primer 1                        | Primer 2                        |
|-------|---------------------------------|---------------------------------|
| Actin | GCC CTG AGG CTC TTT TCC AG      | TGC CAC AGG ATT CCA TAC CC      |
| Rplp0 | AGA TGC AGC AGA TCC GCA T       | GTT CTT GCC CAT CAG CAC C       |
| rOGT  | TCG ATA GTC TAC CCG ATG TGA AGA | AGC TGT GTT AGT GGT GTC TGC ATT |
| mOGT  | ACT GTG TTC GCA GTG ACC TG      | TCA AAT AAC ATG CCT TGG CT      |
